# Supplementary material
Source: bioRxiv or medRxiv preprint supplement (https://www.biorxiv.org/highwire/filestream/67774/field_highwire_adjunct_files/13/157404-7.pdf)
Supplement: Supplementary file [file 157404-7.pdf]

**Table 2. Parameter values used in the simulation**

|                                                                                        |        | References               |
|----------------------------------------------------------------------------------------|--------|--------------------------|
| <b><i>Microtubule (MT) dynamics</i></b>                                                |        |                          |
| Growth velocity ( $V_g$ ) [ $\mu\text{m/s}$ ]                                          | 0.328  | (Srayko et al., 2005)    |
| Shrinkage velocity ( $V_s$ ) [ $\mu\text{m/s}$ ]                                       | 0.537  | (Kozłowski et al., 2007) |
| Catastrophe frequency ( $F_{cat}$ ) at cytoplasm [ $/s$ ] <sup>a</sup>                 | 0.046  | (Kozłowski et al., 2007) |
| Rescue frequency ( $F_{res}$ ) [ $/s$ ] <sup>b</sup>                                   | 1      |                          |
| Number of fibers per pole                                                              | 296    | (Srayko et al., 2005)    |
| <b><i>Pulling force, motor mediated</i></b>                                            |        |                          |
| Stall force of motor ( $F_{stall}$ ) [pN]                                              | 1.1    | (Gross et al., 2000)     |
| Maximum velocity of motor ( $V_{max}$ ) [ $\mu\text{m/s}$ ]                            | 2.0    | (Gross et al., 2000)     |
| <b><i>Pulling force, attachment of FG (cytoplasmic length dependent)</i></b>           |        |                          |
| Density of motors ( $D$ ) [ $/\mu\text{m}$ ]                                           | 0.2    |                          |
| <b><i>Pulling force, attachment of FG (cortical)</i></b>                               |        |                          |
| Potential number of force generators at the cortex                                     | 15     |                          |
| ( $N_{potential}$ , anterior, PAR-3 dependent)                                         |        |                          |
| Potential number of force generators at the cortex                                     | 30     |                          |
| ( $N_{potential}$ , posterior, PAR-2 dependent)                                        |        |                          |
| The mean probability of the activation of the force generators ( $p_{mean}$ ) [ $/s$ ] | 0.5    | (Pecreaux et al., 2006)  |
| <b><i>Spindle as a spring</i></b>                                                      |        |                          |
| Natural length [ $\mu\text{m}$ ]                                                       | 10-22  |                          |
| Spring constant [pN/ $\mu\text{m}$ ]                                                   | 1      |                          |
| <b><i>Size of the cell</i></b>                                                         |        |                          |
| Long axis [ $\mu\text{m}$ ]                                                            | 50     |                          |
| Short axis [ $\mu\text{m}$ ]                                                           | 30     |                          |
| <b><i>Drag force of nucleus/spindle pole</i></b>                                       |        |                          |
| Drag coefficient, for translational movement                                           | 190    |                          |
| ( $\Gamma_{trans}$ ) [pN s/ $\mu\text{m}$ ] <sup>c</sup>                               |        |                          |
| Drag coefficient, for rotational movement ( $\Gamma_{rot}$ )                           | 25,000 |                          |
| [pN s $\mu\text{m}$ ] <sup>c</sup>                                                     |        |                          |
| <b><i>Model-specific parameter</i></b>                                                 |        |                          |
| Time step [s]                                                                          | 0.01   |                          |

<sup>a</sup> See Table S1 for catastrophe frequency at the cortex

<sup>b</sup> A high frequency was used in this study. See text for a detailed explanation.

<sup>c</sup>  $6\pi r\eta$  for translational movement and  $8\pi r^3\eta$  for rotational movement. Here, we set  $r$  (Stokes' radius) to 10  $\mu\text{m}$  and  $\eta$  (viscosity of the cytosol) to 1.0 pNs/ $\mu\text{m}^2$ .
